# Supplementary material for: Association of Axillary Dissection With Systemic Therapy in Patients With Clinically Node-Positive Breast Cancer
Source: PubMed Central journal article supplement (PMC10357358; doi:10.1001/jamasurg.2023.2840), 2023-07-19
Supplement: jamasurg-e232840-s001.pdf [file jamasurg-e232840-s001.pdf]

## Supplementary Online Content

Weber WP, Matrai Z, Hayoz S, et al; TAXIS Study Writing Group. Association of axillary dissection with systemic therapy in patients with clinically node-positive breast cancer. *JAMA Surg*. Published online July 19, 2023. doi:10.1001/jamasurg.2023.2840

**eTable.** Logistic Regression Model for the Effect of Treatment Arm on the Administration of Adjuvant Systemic Therapy and Chemotherapy

This supplementary material has been provided by the authors to give readers additional information about their work.

**eTable.** Logistic Regression Model for the Effect of Treatment Arm on the Administration of Adjuvant Systemic Therapy and Chemotherapy

|                                          | Unadjusted |               | Adjusted   |               |
|------------------------------------------|------------|---------------|------------|---------------|
|                                          | Odds ratio | 95% CI        | Odds ratio | 95% CI        |
| <b>Upfront surgery setting: HR+HER2-</b> |            |               |            |               |
| Adjuvant systemic therapy                | 0.67       | (0.24 - 1.86) | 0.50       | (0.15 - 1.64) |
| Adjuvant chemotherapy                    | 0.74       | (0.22 - 2.46) | 0.72       | (0.19 - 2.67) |
| <b>Neoadjuvant chemotherapy</b>          |            |               |            |               |
| Adjuvant systemic therapy                | 0.92       | (0.49 - 1.75) | 0.86       | (0.43 - 1.70) |
| Adjuvant chemotherapy                    | 1.31       | (0.85 - 2.00) | 1.26       | (0.78 - 2.01) |

Multivariable analyses adjusted for palpable vs. non-palpable disease, menopausal status, tumor subtype, grade, age, year and country.
