# Supplementary material for: Association of Axillary Dissection With Systemic Therapy in Patients With Clinically Node-Positive Breast Cancer
Source: PubMed Central journal article supplement (PMC10357358; doi:10.1001/jamasurg.2023.2840), 2023-07-19
Supplement: jamasurg-e232840-s002.pdf [file jamasurg-e232840-s002.pdf]

## Data Sharing Statement

Weber. Association of Axillary Dissection With Systemic Therapy in Patients With Clinically Node-Positive Breast Cancer. *JAMA Surg.* Published July 19, 2023.

doi:10.1001/jamasurg.2023.2840

### Data

**Data available:** Yes

**Data types:** Deidentified participant data

**How to access data:** Upon individual request to [walter.weber@usb.ch](mailto:walter.weber@usb.ch).

**When available:** With publication

### Supporting Documents

**Document types:** None

### Additional Information

**Who can access the data:** Anyone with the respective approval(s).

**Types of analyses:** Any kind of analysis with the respective approval(s).

**Mechanisms of data availability:** After approval(s) and with a signed data transfer agreement.
